# Supplementary material for: Predictable incorporation of nitrogen into carbon dots: insights from pinacol rearrangement and iminium ion cyclization
Source: Royal Society of Chemistry journal article supplement (doi:10.1039/d3na00550j), 2023-01-01
Supplement: d3na00550j1.pdf [file d3na00550j1.pdf]

Electronic Supplementary Information for

**Predictable incorporation of nitrogen into carbon dots: Insights from pinacol rearrangement and iminium ion cyclization**

Soohyun Cho<sup>a</sup>, Chan-Woo Jung<sup>b</sup>, Dajin Lee<sup>a</sup>, Yerim Byun<sup>a</sup>, Hyemin Kim<sup>c</sup>, Hyunho Han<sup>d</sup>, Ji-Hee Kim<sup>\*,c</sup>, and Woosung Kwon<sup>\*,a,f</sup>

<sup>a</sup>Department of Chemical and Biological Engineering, Sookmyung Women's University, Seoul 04310, South Korea

<sup>b</sup>Department of Energy Science, Sungkyunkwan University, Suwon 16419, South Korea

<sup>c</sup>Department of Cosmetics Engineering, Konkuk University, Seoul 05029, South Korea

<sup>d</sup>Department of Urology, Urological Science Institute, Yonsei University College of Medicine, Seoul 03722, South Korea

<sup>e</sup>Department of Physics, Pusan National University, Busan 46241, South Korea

<sup>f</sup>Institute of Advanced Materials and Systems, Sookmyung Women's University, Seoul 04310, South Korea

\*Corresponding author.

[wkwon@sookmyung.ac.kr](mailto:wkwon@sookmyung.ac.kr) (Woosung Kwon)

[kimjihee@pusan.ac.kr](mailto:kimjihee@pusan.ac.kr) (Ji-Hee Kim)

## **Table of Contents**

**Fig. S1.** XPS spectra of G-CDs

**Fig. S2.** XPS spectra of GE-CDs

**Fig. S3.** TEM images of GE-CDs

**Fig. S4.** DLS size distribution curve of GE-CDs

**Fig. S5.** Optical properties of G-CDs

**Fig. S6.** Optical properties of GE-CDs

**Fig. S7.** Optical properties of GE-CDs with different reaction times

**Fig. S8.** Optical properties of GE-CDs in presence of acetic acid

**Fig. S9.** Optical properties of GE-CDs in presence of acetic acid in high concentration

**Fig. S10.** Calculated molecular orbital energy levels and band structures of pyrene variants

**Fig. S11.** TA contour maps of G-CDs and GE-CDs

**Fig. S12.** TA spectra of G-CDs and GE-CDs

**Table S1.** TA fitting parameters of G-CDs and GE-CDs

**Fig. S13.** TRPL spectra of G-CDs and GE-CDs

**Table S2.** TRPL fitting parameters of G-CDs and GE-CDs

**Fig. S14.** Theoretical PL QYs of G-CDs and GE-CDs

**Fig. S15.** Absolute PL QYs of GE-CDs

**Fig. S16.** PL emission spectrum of SOSG, DHR 123, and Red Fluorometric ROS Kit

**Fig. S17.** Live/dead assay results in the control group

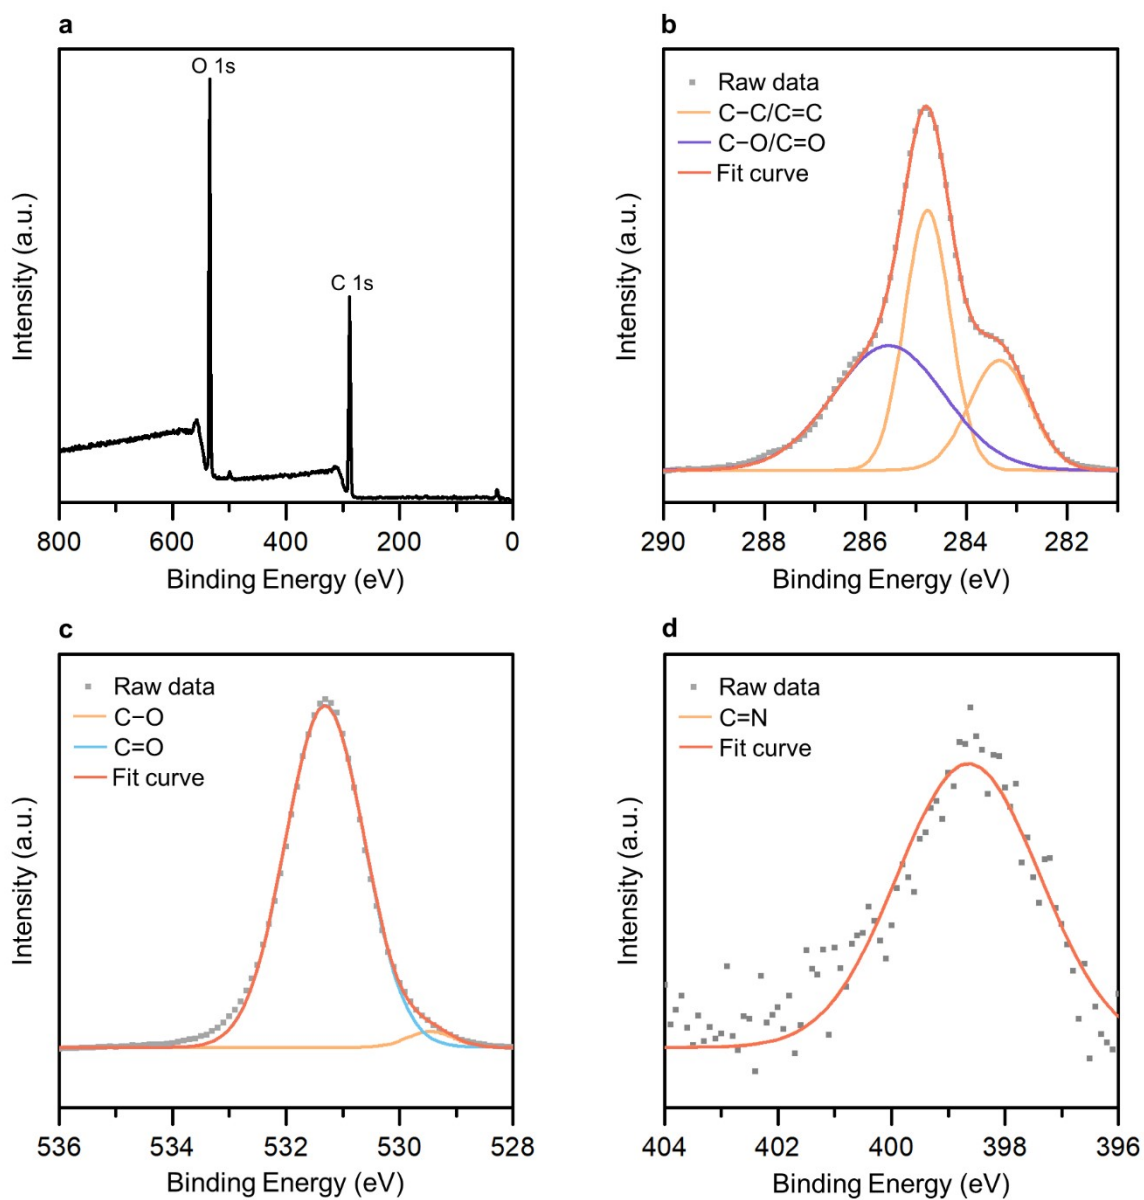

**Fig. S1.** (a) XPS spectrum of G-CDs. High-resolution XPS spectra of (b) carbon 1s, (c) oxygen 1s, and (d) nitrogen 1s of G-CDs.

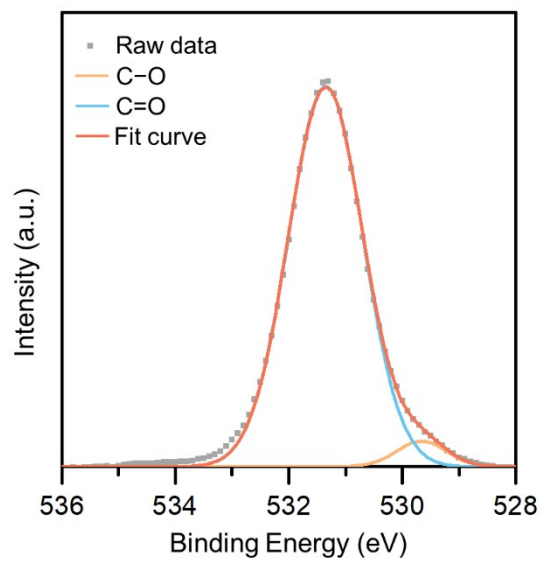

**Fig. S2.** High-resolution XPS spectra of oxygen 1s of GE-CDs.

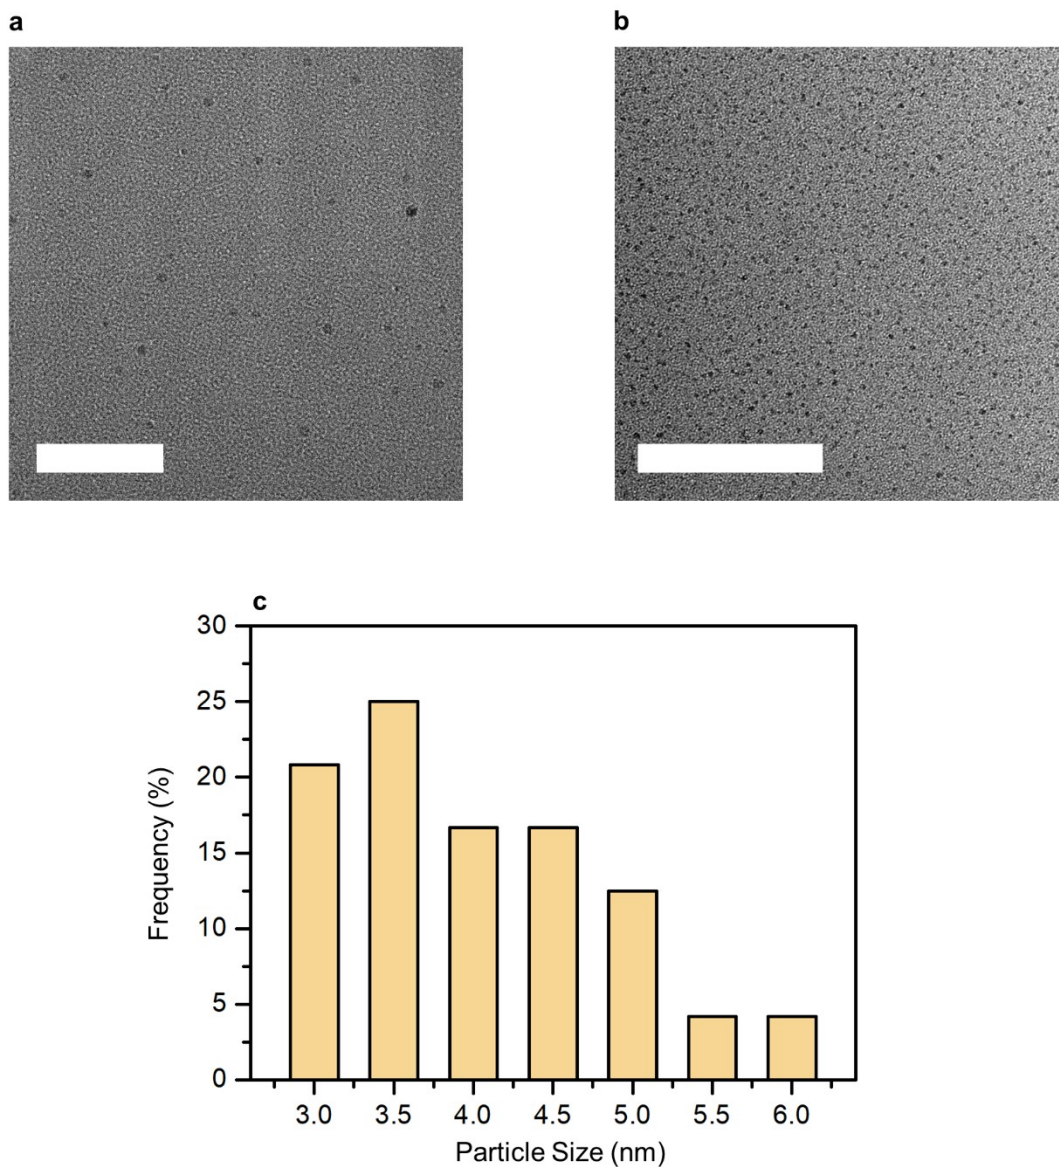

**Fig. S3.** TEM images of GE-CDs at different magnifications: (a) 50 and (b) 100 nm scale bars. (c) The particle size distribution of GE-CDs.

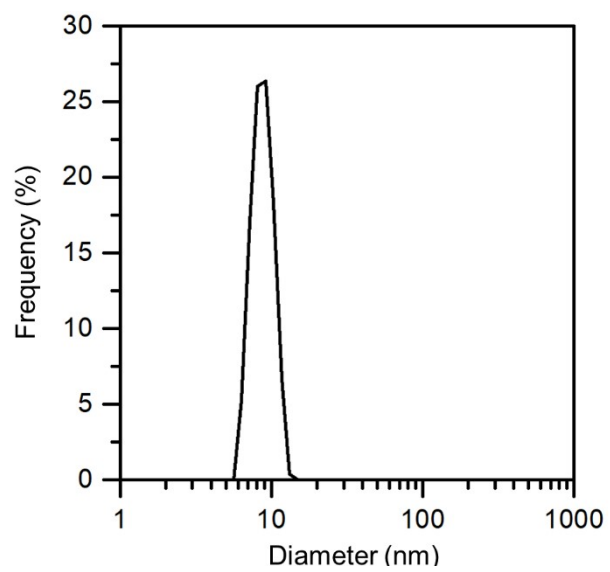

**Fig. S4.** DLS size distribution curve of GE-CDs.

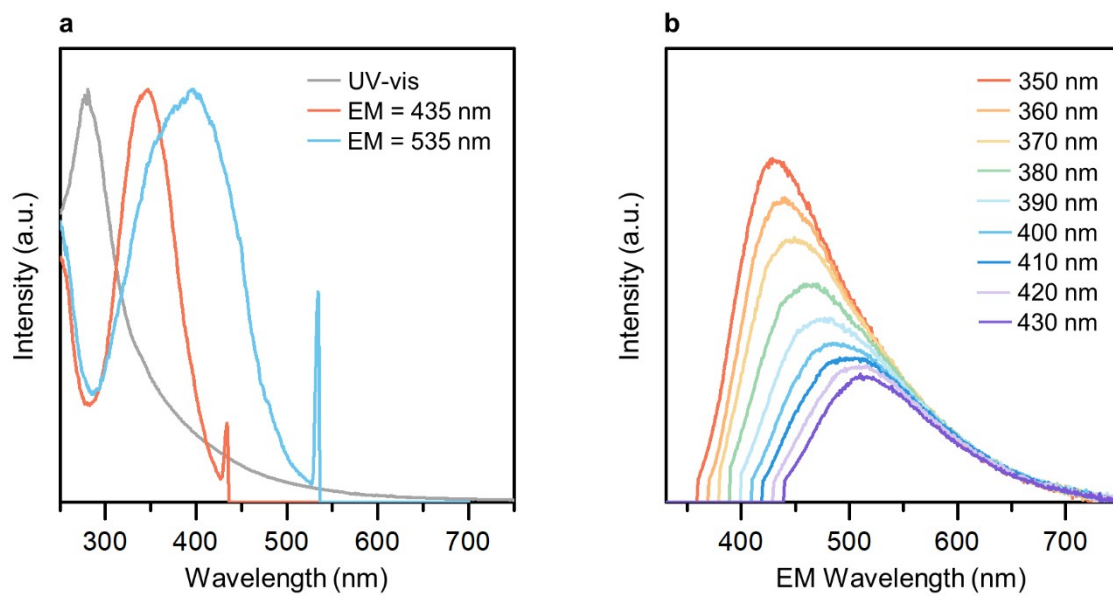

**Fig. S5.** (a) Normalized UV-vis absorption and PLE spectra of G-CDs. (b) PL emission spectra of G-CDs under different excitation wavelengths.

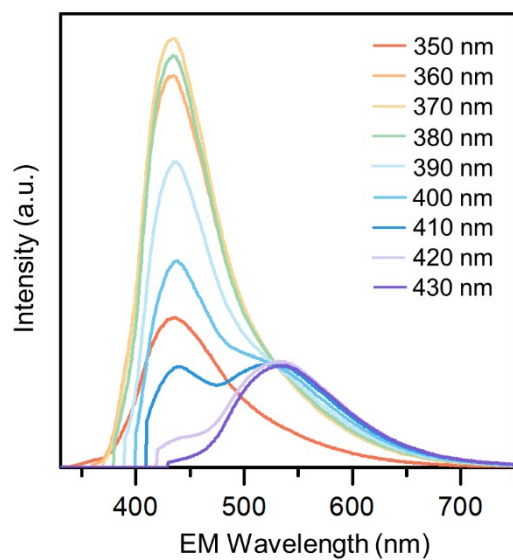

**Fig. S6.** PL emission spectra of GE-CDs under different excitation wavelengths.



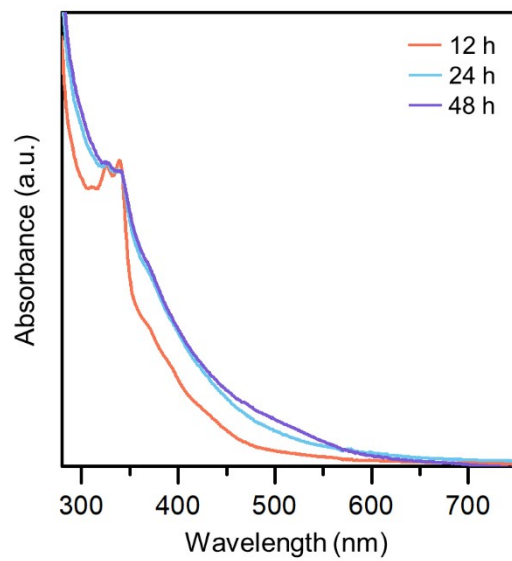

**Fig. S7.** UV-vis spectra of GE-CDs at different reaction times.

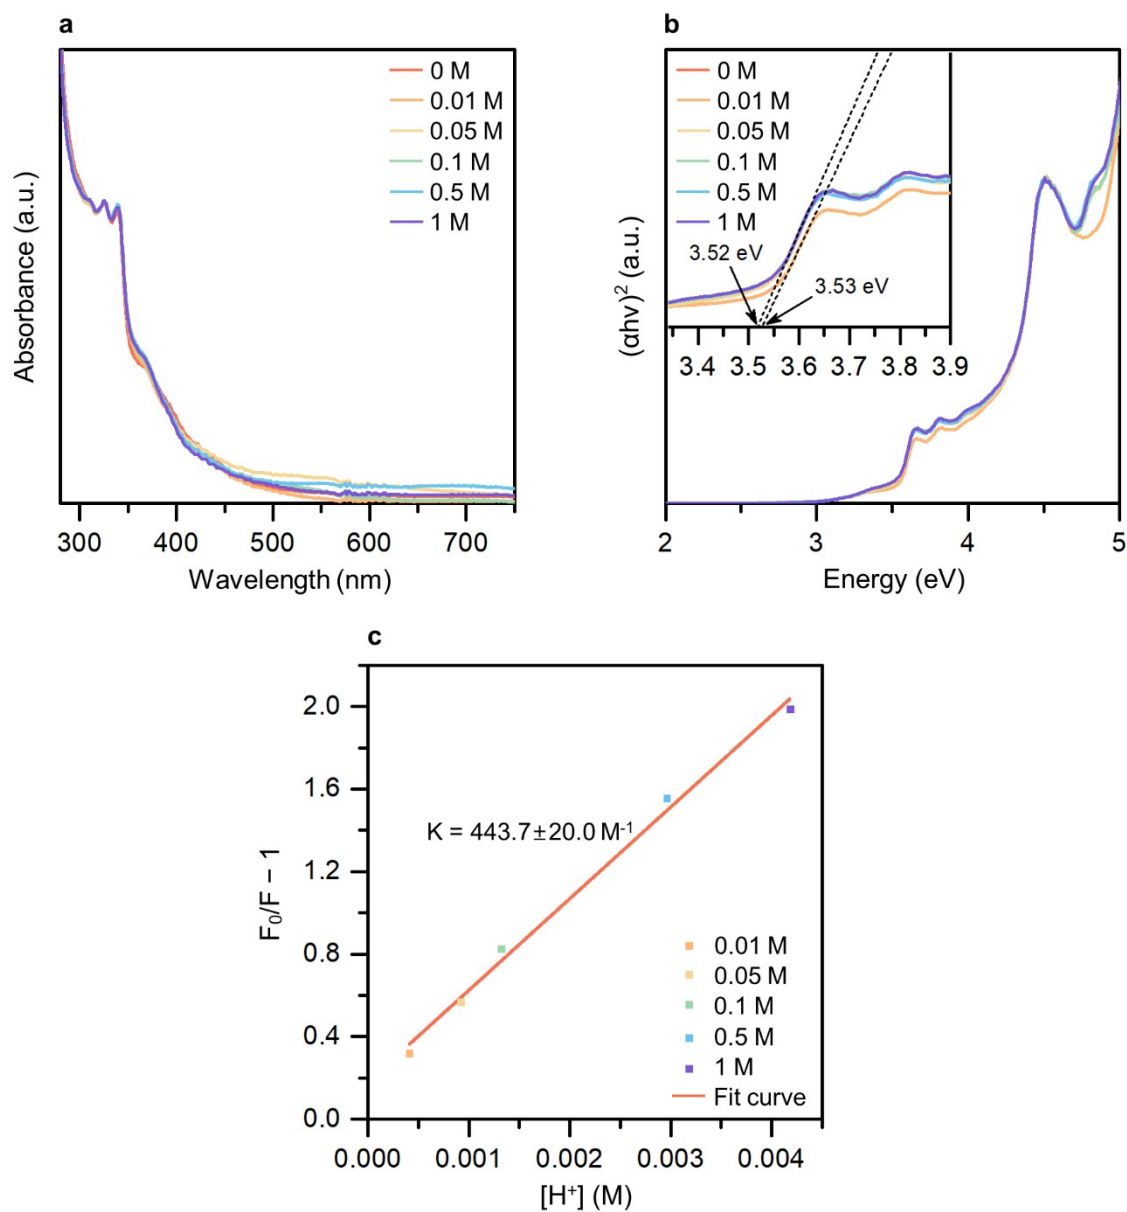

**Fig. S8.** (a) UV-vis spectra and (b) Tauc plots of GE-CDs in the presence of acetic acid at different concentrations. The inset shows magnified spectra of the 3.35–3.9 eV range. (c) Relative PL intensity of GE-CDs as a function of proton concentration in the presence of acetic acid.

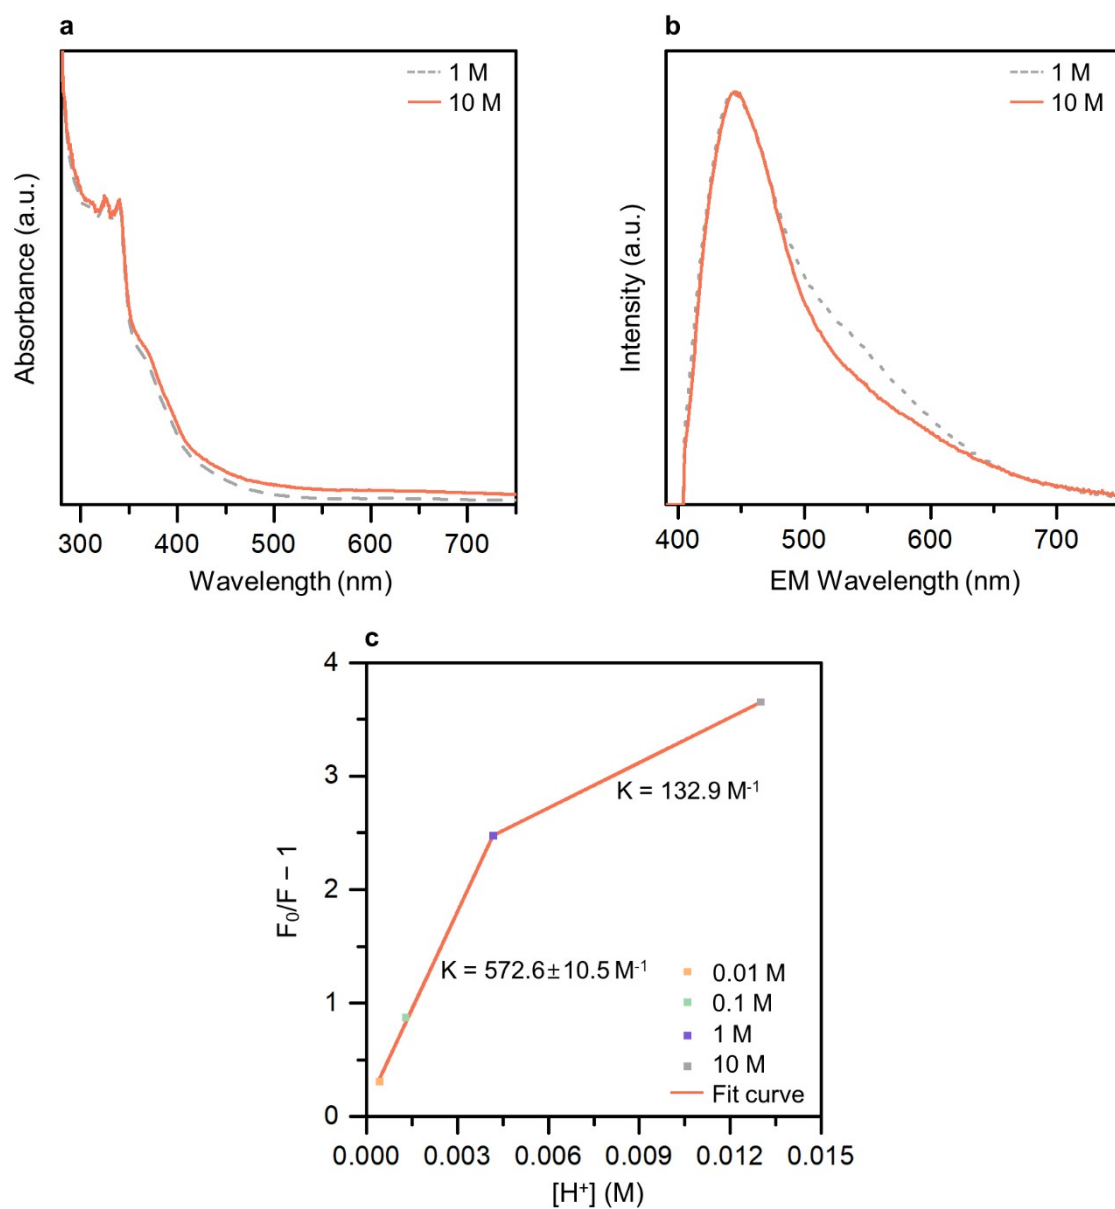

**Fig. S9.** (a) UV-vis spectra and (b) PL emission spectra of GE-CDs at excitation wavelength of 390 nm in the presence of acetic acid with concentrations of 1M and 10M. (c) Relative PL intensity of GE-CDs as a function of proton concentration in the presence of acetic acid.

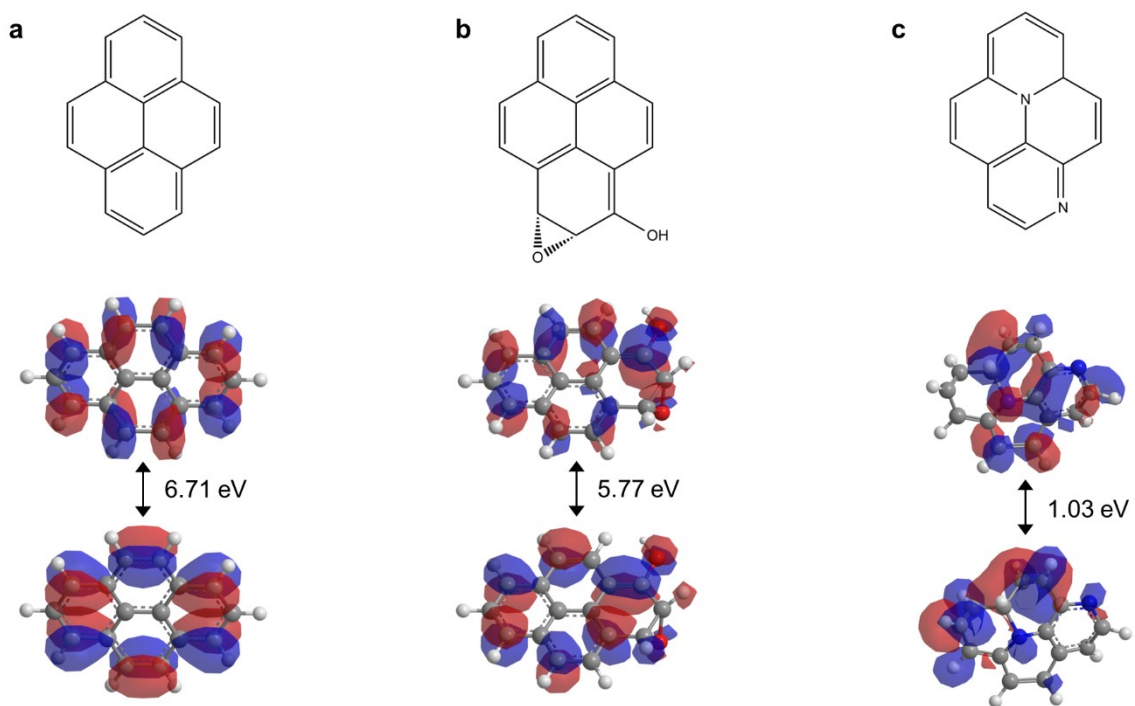

**Fig. S10.** Molecular orbital energy levels and band structures of (a) pyrene, (b) oxygenic pyrene, and (c) pyrene with graphitic nitrogen (grey: carbon, blue: nitrogen, red: oxygen, white: hydrogen).

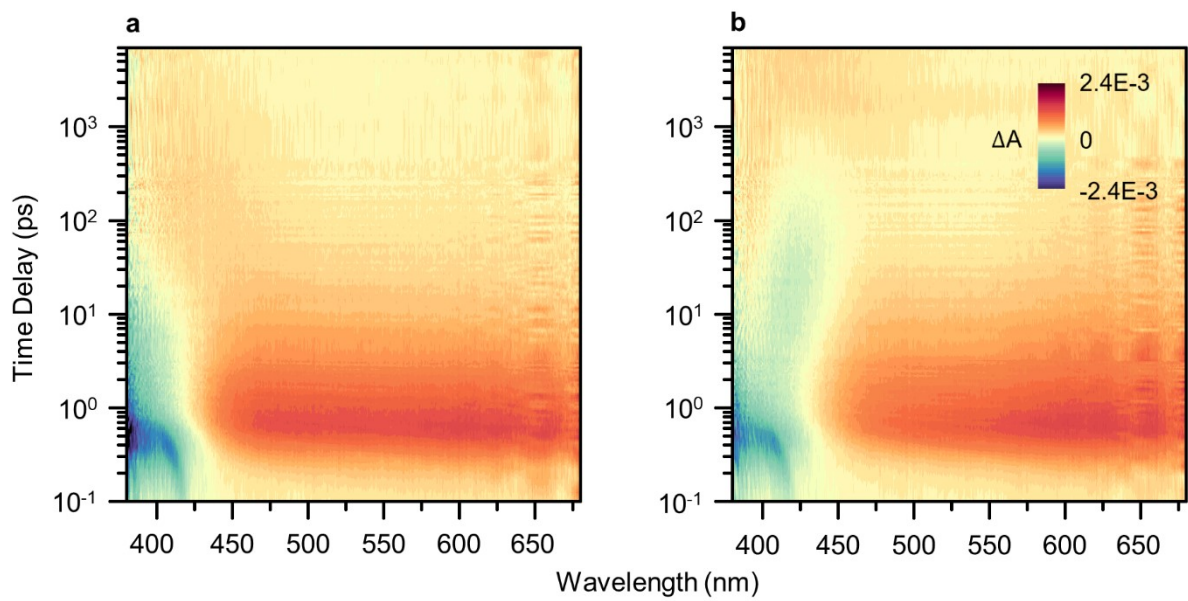

**Fig. S11.** TA contour maps of (a) G-CDs and (b) GE-CDs excited by a 360 nm pump wavelength.

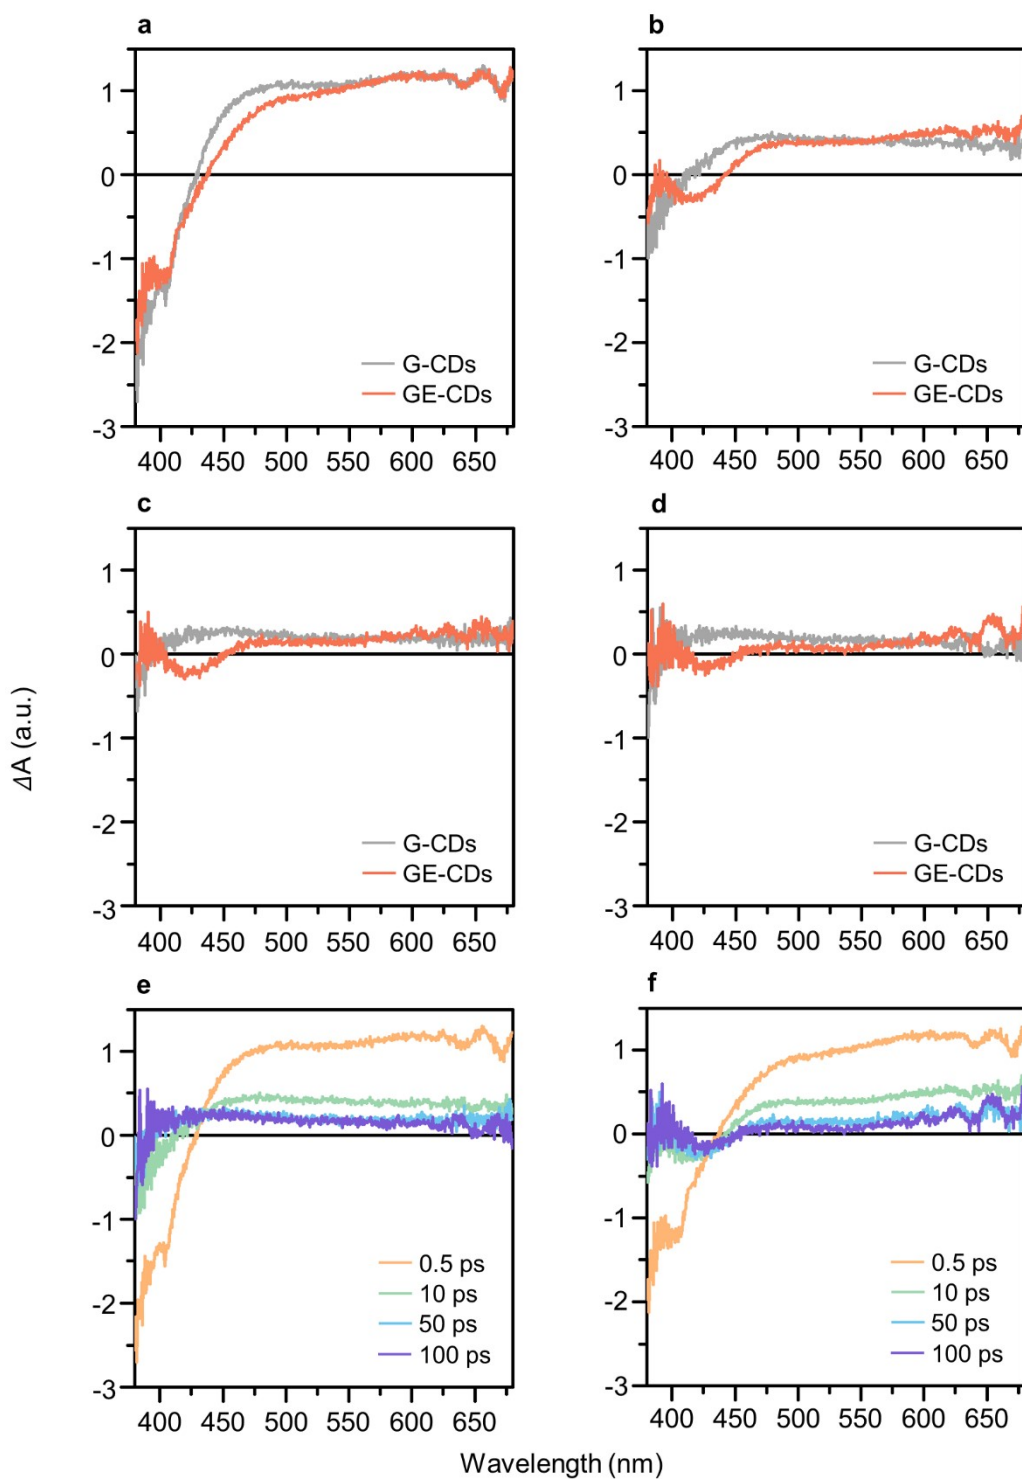

**Fig. S12.** Comparison in the TA spectra of G-CDs and GE-CDs at time delays of (a) 0.5 ps, (b) 10 ps, (c) 50 ps, and (d) 100 ps. TA spectra of (e) G-CDs and (f) GE-CDs at different delay times and excitation wavelength of 360 nm.

**Table S1.** TA fitting parameters of the G-CDs and GE-CDs under different excitation wavelengths at (a) 435 nm and (b) 535 nm probe wavelength.

(a)

| Sample | Excitation (nm) | $\tau$ (ps) |
|--------|-----------------|-------------|
| G-CDs  | 360             | 2.31        |
| GE-CDs | 360             | 5.20        |

(b)

| Sample | Excitation (nm) | $\tau_1$ (ps) | $\tau_2$ (ps) |
|--------|-----------------|---------------|---------------|
| G-CDs  | 360             | 1.73          | -             |
|        | 440             | 5.03          | -             |
| GE-CDs | 360             | 1.6           | 16.1          |
|        | 440             | 20.0          | -             |

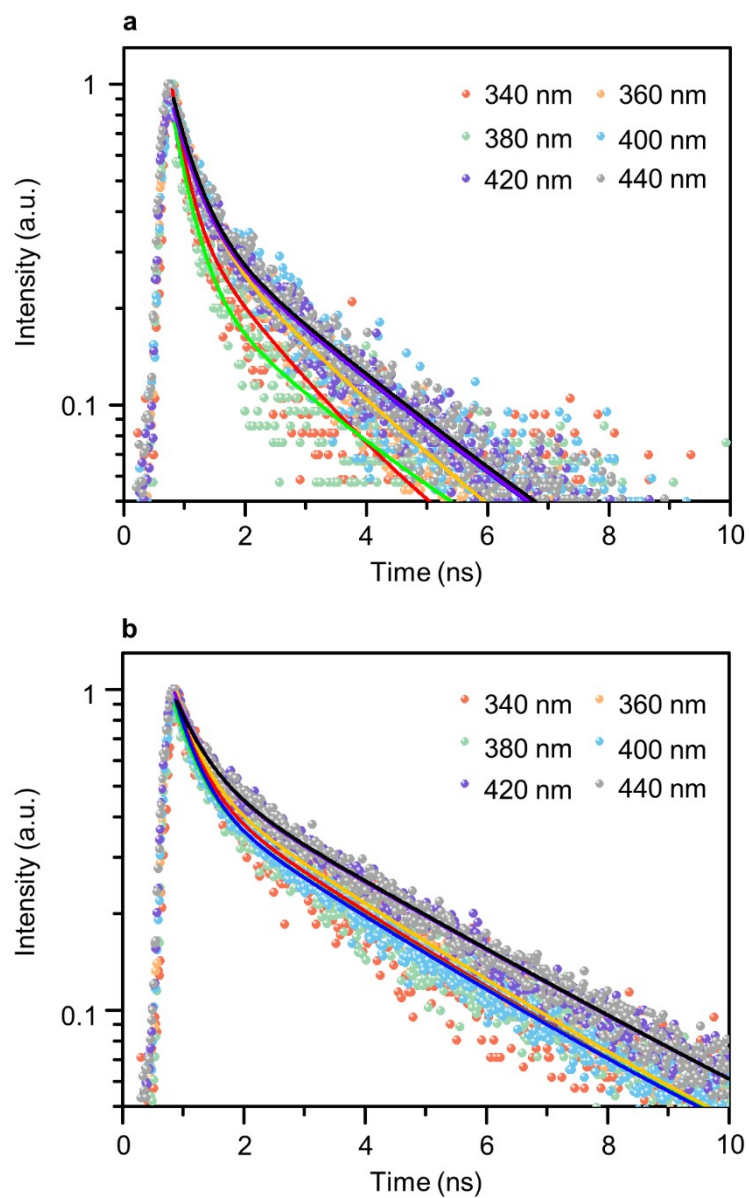

**Fig. S13.** Normalized PL intensities of (a) G-CDs and (b) GE-CDs at 535 nm emission as a function of pump exposure time under excitation at 340, 360, 380, 400, 420, and 440 nm. The solid lines in deep colors indicate exponential decay fits.



**Table S2.** TRPL fitting parameters for G-CDs and GE-CDs under different excitation wavelengths at 535 nm emission wavelength.

| Sample | Excitation (nm) | $\tau_N$ (ns) | $\tau_R$ (ns) |
|--------|-----------------|---------------|---------------|
| G-CDs  | 340             | 0.24          | 1.80          |
|        | 360             | 0.37          | 2.38          |
|        | 380             | 0.31          | 2.55          |
|        | 400             | 0.37          | 2.72          |
|        | 420             | 0.38          | 2.75          |
|        | 440             | 0.38          | 2.77          |
| GE-CDs | 340             | 0.38          | 3.44          |
|        | 360             | 0.38          | 3.43          |
|        | 380             | 0.38          | 3.52          |
|        | 400             | 0.38          | 3.54          |
|        | 420             | 0.47          | 3.96          |
|        | 440             | 0.49          | 3.97          |

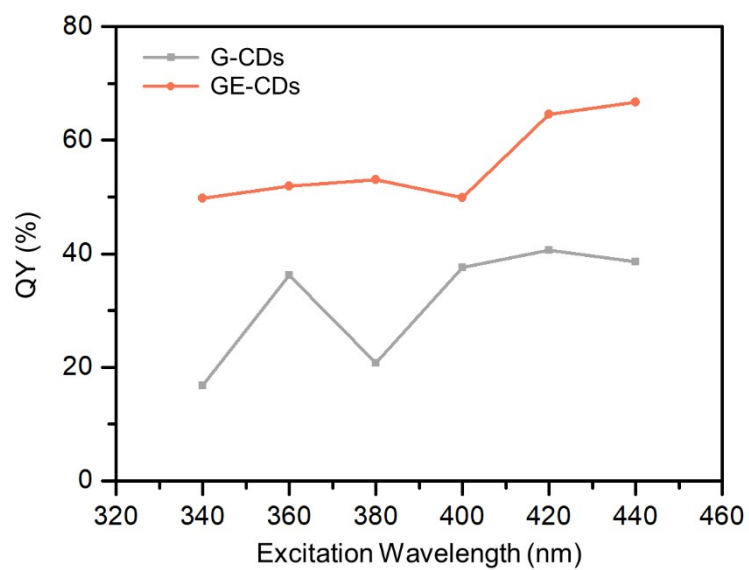

**Fig. S14.** Theoretical calculations of PL QYs for G-CDs and GE-CDs at various excitation wavelengths.

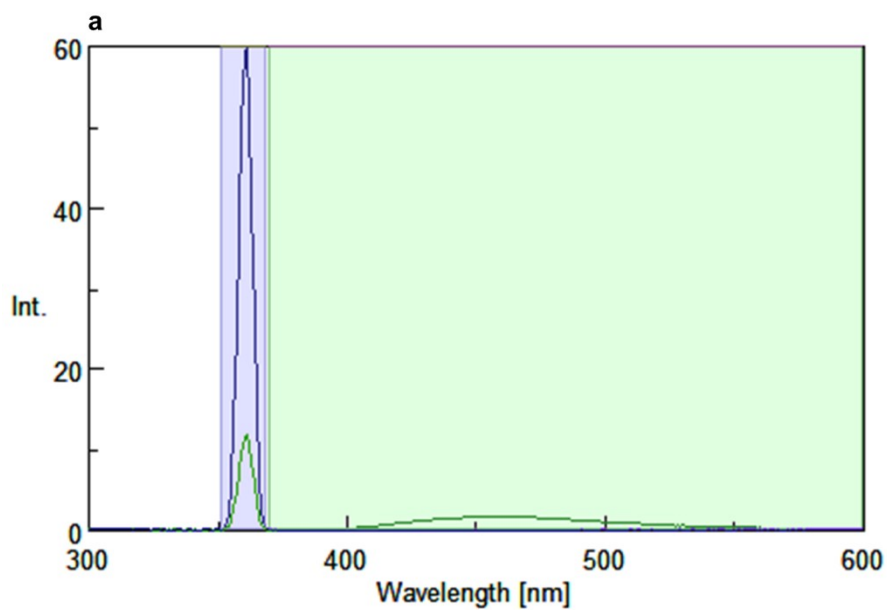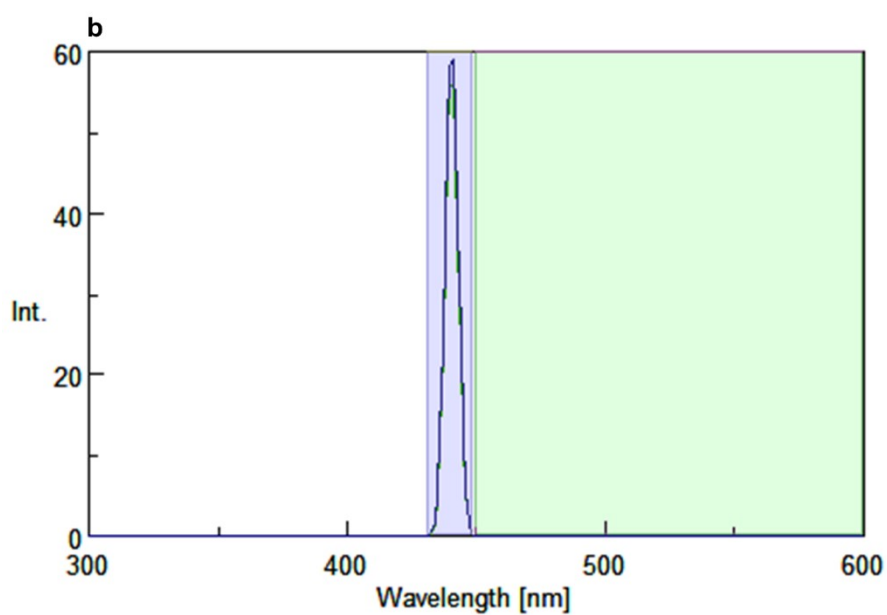

| Excitation Wavelength (nm) | Absorbance (%) | Ext. Quantum Efficiency (%) | Int. Quantum Efficiency (%) | Incident Light | Fluorescence | Scattering |
|----------------------------|----------------|-----------------------------|-----------------------------|----------------|--------------|------------|
| 360                        | 79.7           | 46.377                      | 58.189                      | 398.39         | 184.76       | 80.87      |
| 440                        | 5.931          | 3.105                       | 52.354                      | 385.72         | 11.98        | 362.85     |

**Fig. S15.** Absolute QY measurements of GE-CDs at excitation wavelengths of (a) 360 and (b) 440 nm utilizing the Jasco Spectra Manager II software.

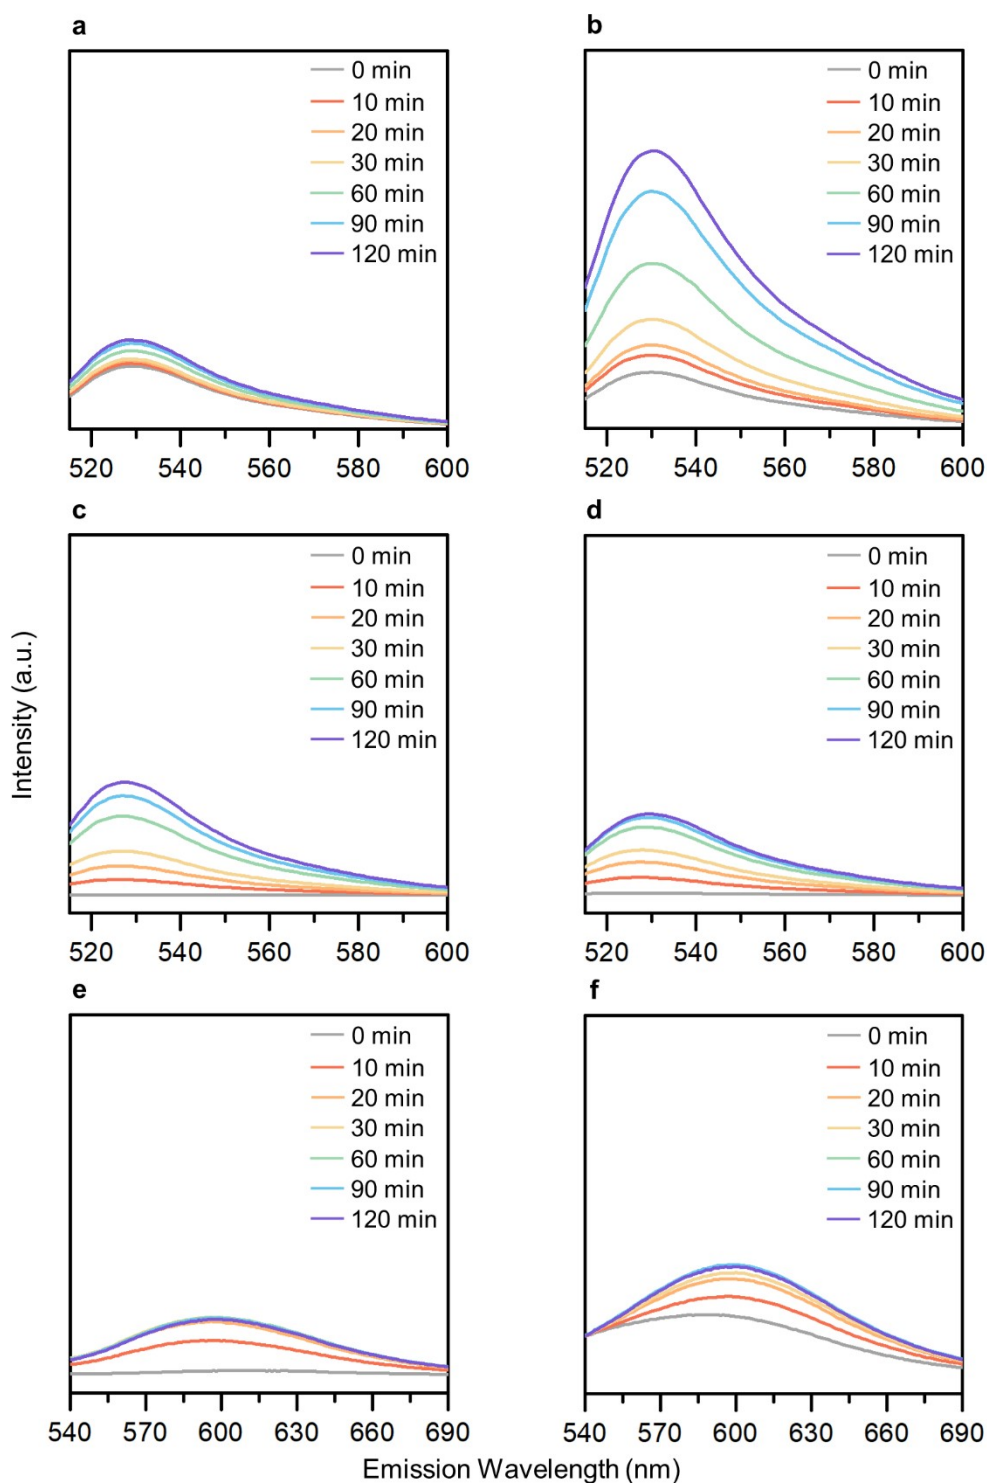

**Fig. S16.** The PL spectra of (a, c, e) pure water and (b, d, f) GE-CDs (0.5 mg/mL) under UV radiation (254 nm) with (a, b) SOSG, (c, d) DHR 123, and (e, f) Red Fluorometric ROS Kit for a duration of 0–120 min.

**a**

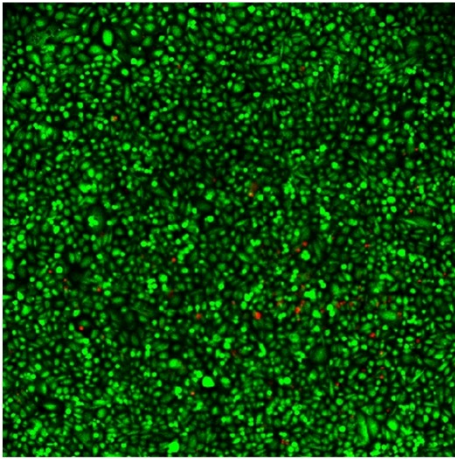

**b**

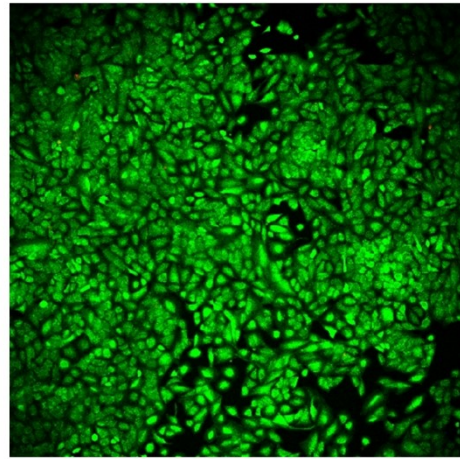

**Fig. S17.** Fluorescence images of calcein AM- and PI-co-stained control groups of (a) PC3 and (b) A549 cells irradiated only with the laser.
